# Supplementary material
Source: Springer Nature journal article supplement (https://www.springermedizin.de/resource/supplementary/12997_2009_69_MOESM2_ESM.pdf/9623262)

# Active sensitization

Cyclophosphamide  
30mg/kg ip

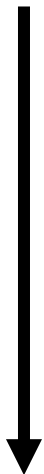

OVA + Al(OH)<sub>3</sub> ip.  
2mg 100mg

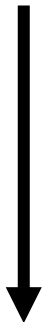

OVA + Al(OH)<sub>3</sub> ip.  
0.01mg 100mg

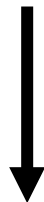

-2day

0

3W

Procaterol ip.  
0.1mg/kg

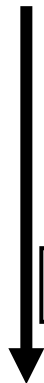

0.5h

OVA inhalation  
challenge

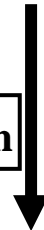

6W

Measurement of  
1) cough reflex sensitivity  
2) ENO measurement

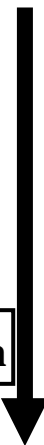

0.5h

6W+1day

Vehicle or L-NAME

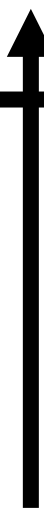

Supplement: MOESM2 [file 9623262]
